# Supplementary material for: Design of Novel Poly(Propranolol) Acrylate and Methacrylate Polymers through Radical Polymerization for Antibacterial Activity and Metal Ion Absorption
Source: Hindawi journal article supplement (doi:10.1155/2024/6626223), 2024-01-01
Supplement: f1 [file 6626223.f1.docx]

**Supporting Information File#**

**Design of novel poly(propranolol) acrylate and methacrylate polymers through radical polymerization for antibacterial activity and metal ion absorption**

John Santhosh Kumar1,*, P. Kamaraj1,*, P. A. Vivekanand2, Govindasami Periyasami3, Mostafizur Rahaman3, Perumal Karthikeyan4, U. T. Uthappa5, Selvakumar Palaniappan6,**

1 Department of Chemistry, Bharath Institute of Higher Education and Research (BIHER), Chennai-600073, India

2 Centre for Catalysis Research, Department of Chemistry, Saveetha Engineering College, Thandalam, Chennai-602105, India

3 Department of Chemistry, College of Science, King Saud University, P.O. Box 2455, Riyadh 11451, Saudi Arabia

4 Departmentof Chemistry and Biochemistry, Ohio State University, 170A CBEC, 151 Woodruff Avenue, Columbus, Ohio 43210

5 School of Chemical Engineering, Yeungnam University, 280 Daehak-Ro, Gyeongsan, Gyeongbuk 38541, Republic of Korea

6 Department of Food Science and Postharvest Technology, Haramaya Institute of Technology, Haramaya University, Dire Dawa-P.O. Box 138, Ethiopia

Corresponding Authors:

[jskbi@rediffmail.com](mailto:jskbi@rediffmail.com); [kamaraj97@yahoo.co.in](mailto:kamaraj97@yahoo.co.in); [selva.kumar@haramaya.edu.et](mailto:selva.kumar@haramaya.edu.et)

***Table of contents***

| S. No. | **Content** | Page |
| --- | --- | --- |
| 1 | General procedure for the synthesis of monomer and polymers | S2 |
| 2 | NMR spectra of monomers | S3 |
| 3 | NMR spectroscopic analysis of monomers | S4 |
| 4 | NMR spectra of polymers | S5 |
| 5 | NMR spectroscopic analysis of polymers | S6-S7 |
| 6 | GPC graph of polymers S3(a) & S3(b) | S7-S8 |
| 7 | Antibacterial activity: Zone of inhibition of S4a-d | S8-S9 |
| 8 | Antibacterial inhibition date Table S1 | S9 |

1. **Experimental**

*Synthesis of 1-(isopropylamino)-3-(1-naphthyloxy)-2-propanoacrylate (IANOPA) and 1-(isopropylamino)-3-(1-naphthyloxy)-2-propanomethacrylate (IANOPMA)*

Acryloyl/ methacryloyl chloride were synthesised from their respective acrylic/ methacrylic acids using Stampel *et al.* method in the presence of benzoyl chloride [19, 20]. For the production of 1-(isopropylamino)-3-(1-naphthyloxy)-2-propanoacrylate/ methacrylate, a three necked round-bottomed flask (500mL) containing of 1-(isopropylamino)-3-(1-naphthyloxy)-2-propanol (10g), Hydroquinone (0.5g), dichloromethane (DCM) (200 mL), and triethylamine (13.6 mL) were cooled at 0–5 °C. Simultaneously, the dissolved Acryloyl/ Methacryloyl chloride in DCM (20 mL) were taken in dropping funnel was gently added to the aforementioned mixture at 0 to 5°C (Scheme 1). It continued to stir for an hour. After the removal of cooling bath, the reaction mixture was stirred at room temperature for a further two hours. Triethylammonium chloride that had accumulated was filtered out. With 0.1% of NaOH solution the residue was washed and then with distilled water. By using rotary evaporator, the solvent DCM was removed and followed by drying with dehydrated sodium sulfate. The yield of product obtained is found to be 70%.


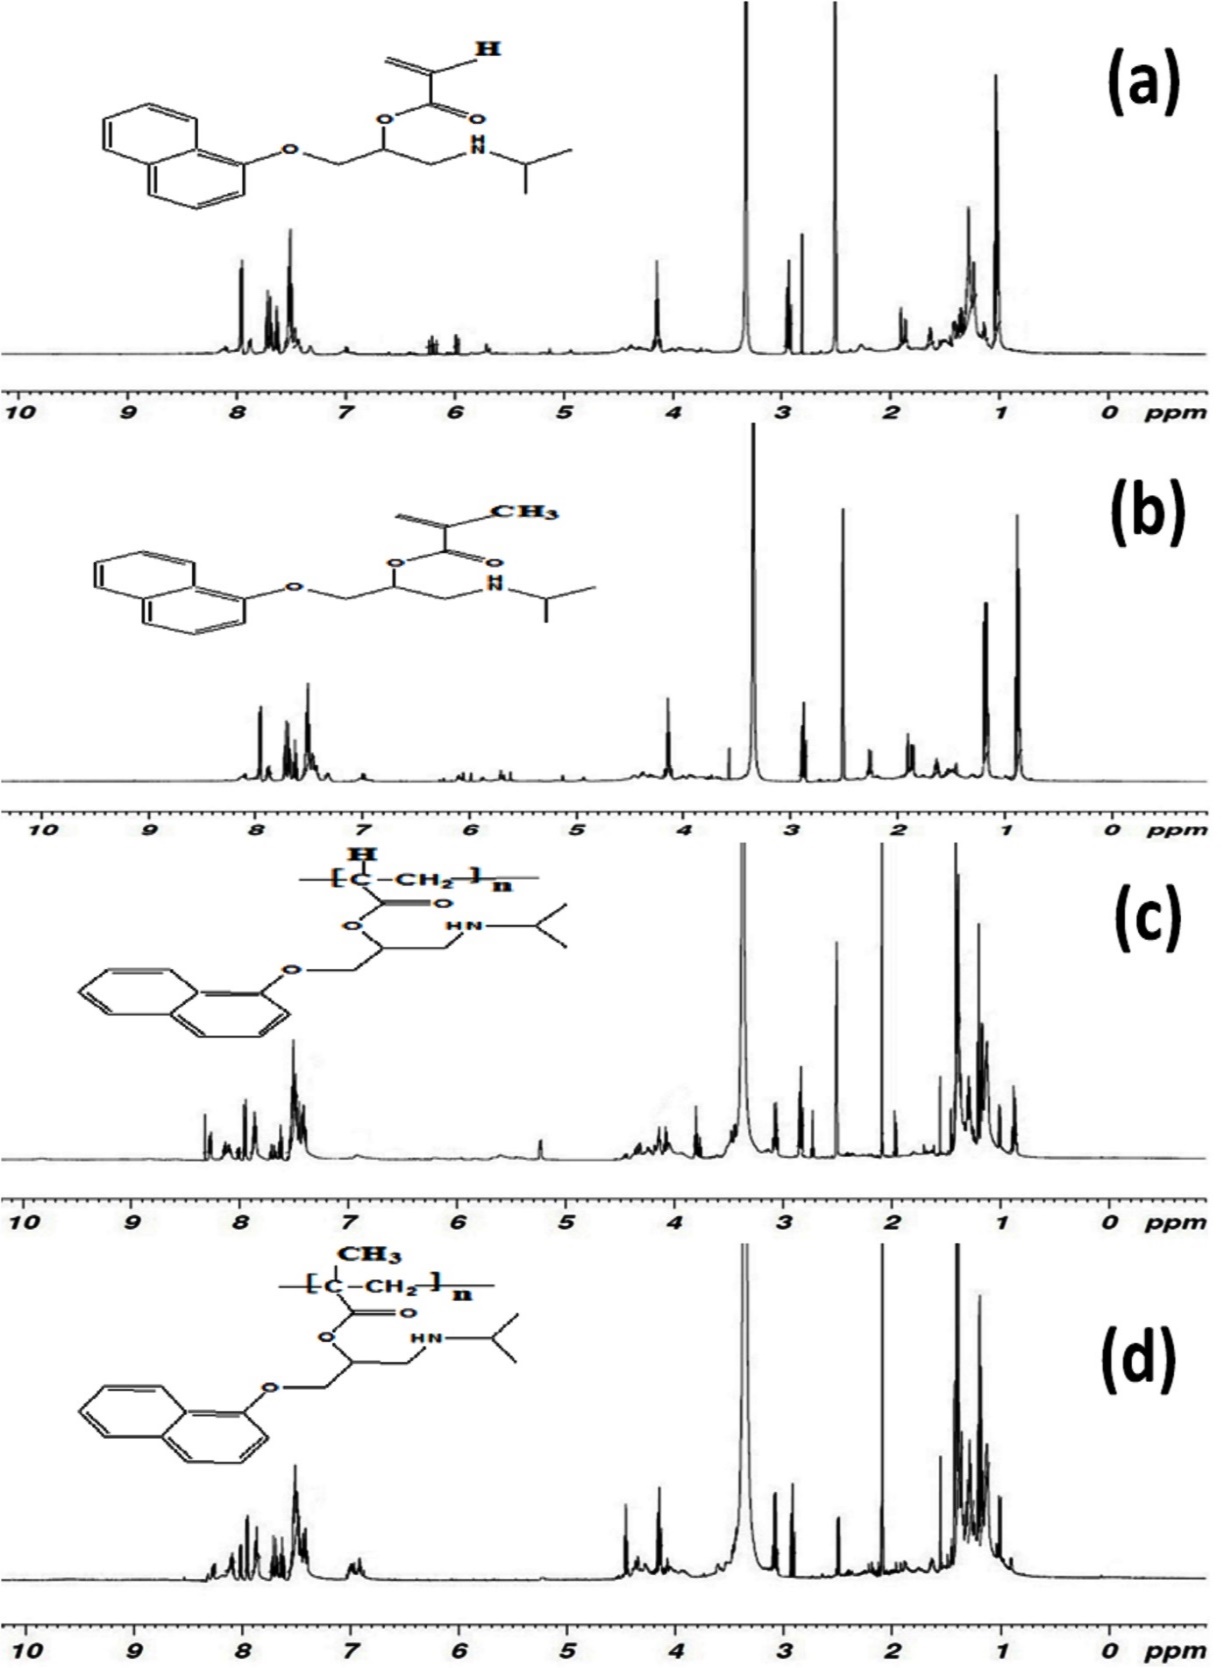


**FIGURE S1**. 1H -NMR Spectra of monomers (a) IANOPA, (b) IANOPMA and polymers (c) IANOPA, (d) IANOPMA

**NMR spectroscopic analysis of monomer structure**

*Monomer (IANOPA) - 1H NMR spectrum (CDCl3, δ ppm)*

The monomer (IANOPA) proton NMR spectrum is displayed in FIGURE S1(a).Signals corresponding to the isopropyl methyl group are at 1.0–1.1 ppm. The methine –NH proton show signal at 1.95ppm. The signals at 2.8 and 2.95 correspond to isopropyl methine proton and doublet of methylene proton (–CH2–N) respectively. The methylene proton (–O–CH2–) shows signal at 4.1ppm. Vinyl protons are responsible for the emergence of distinctive peaks at 5.8–6.2ppm, whereas aromatic protons are responsible for the appearance of multiplets at 7.3–8.1ppm.

*Monomer (IANOPMA) - 1H NMR spectrum (CDCl3, δppm):*

The monomer (IANOPMA) proton NMR spectrum is depicted in FIGURE S1(b). Signals corresponding to isopropyl methyl group are at 1.1–1.2 ppm. The methine –NH proton show signal at 1.8ppm. The signals at 2.6 and 2.8 correspond to isopropyl methine proton and doublet of methylene proton (–CH2–N) respectively. The methylene proton (–O–CH2–) shows signal at 4.2ppm. The appearance of characteristic peaks at 5.6–6.2ppm is due to vinyl protons and at 7.4–8.1ppm shows multiplet of aromatic protons. The signal at 1.9 corresponds to acrylic (–CH) methyl proton.

*Carbon-13 NMR spectrum of monomer (IANOPA) (CDCl3, δppm):*

FIGURE S2(a) shows decoupled 13C NMR spectrum of monomer (IANOPA). Resonance signals at 23 ppm corresponds to isopropyl carbons (-CH3). The (–H2C–NH) and (–HC–NH) show resonance signal at 45 and 48 ppm respectively. Similarly (–H2C-O) and (–HC-O) shows resonance signal at 68 and 73ppm respectively. The aromatic carbons show resonance signal at 132ppm where as the vinyl carbons shows signal at 125 as well as 138 ppm. The ester carbonyl carbon (-C=O) is represented by the resonance signals at 168 ppm.

*Carbon-13 NMR spectrum of monomer (IANOPMA) (CDCl3, δppm):*

FIGURE S2(b) shows decoupled 13C NMR spectrum of monomer (IANOMPA). The methacrylate (–CH3) carbon and isopropyl carbons (–CH3) shows resonance signals at 19 and 23ppm respectively. The (–H2C–NH) and (–HC–NH) show resonance signal at 45 and 49ppm respectively. Similarly (–H2C-O) and (–HC-O) shows resonance signal at 67 and 72ppm respectively. The aromatic carbons resonance signal appears at 130ppm where as the vinyl carbons shows signal at 128 as well as 135 ppm. The ester carbonyl carbon (-C=O) is represented by the resonance signals at 169 ppm.


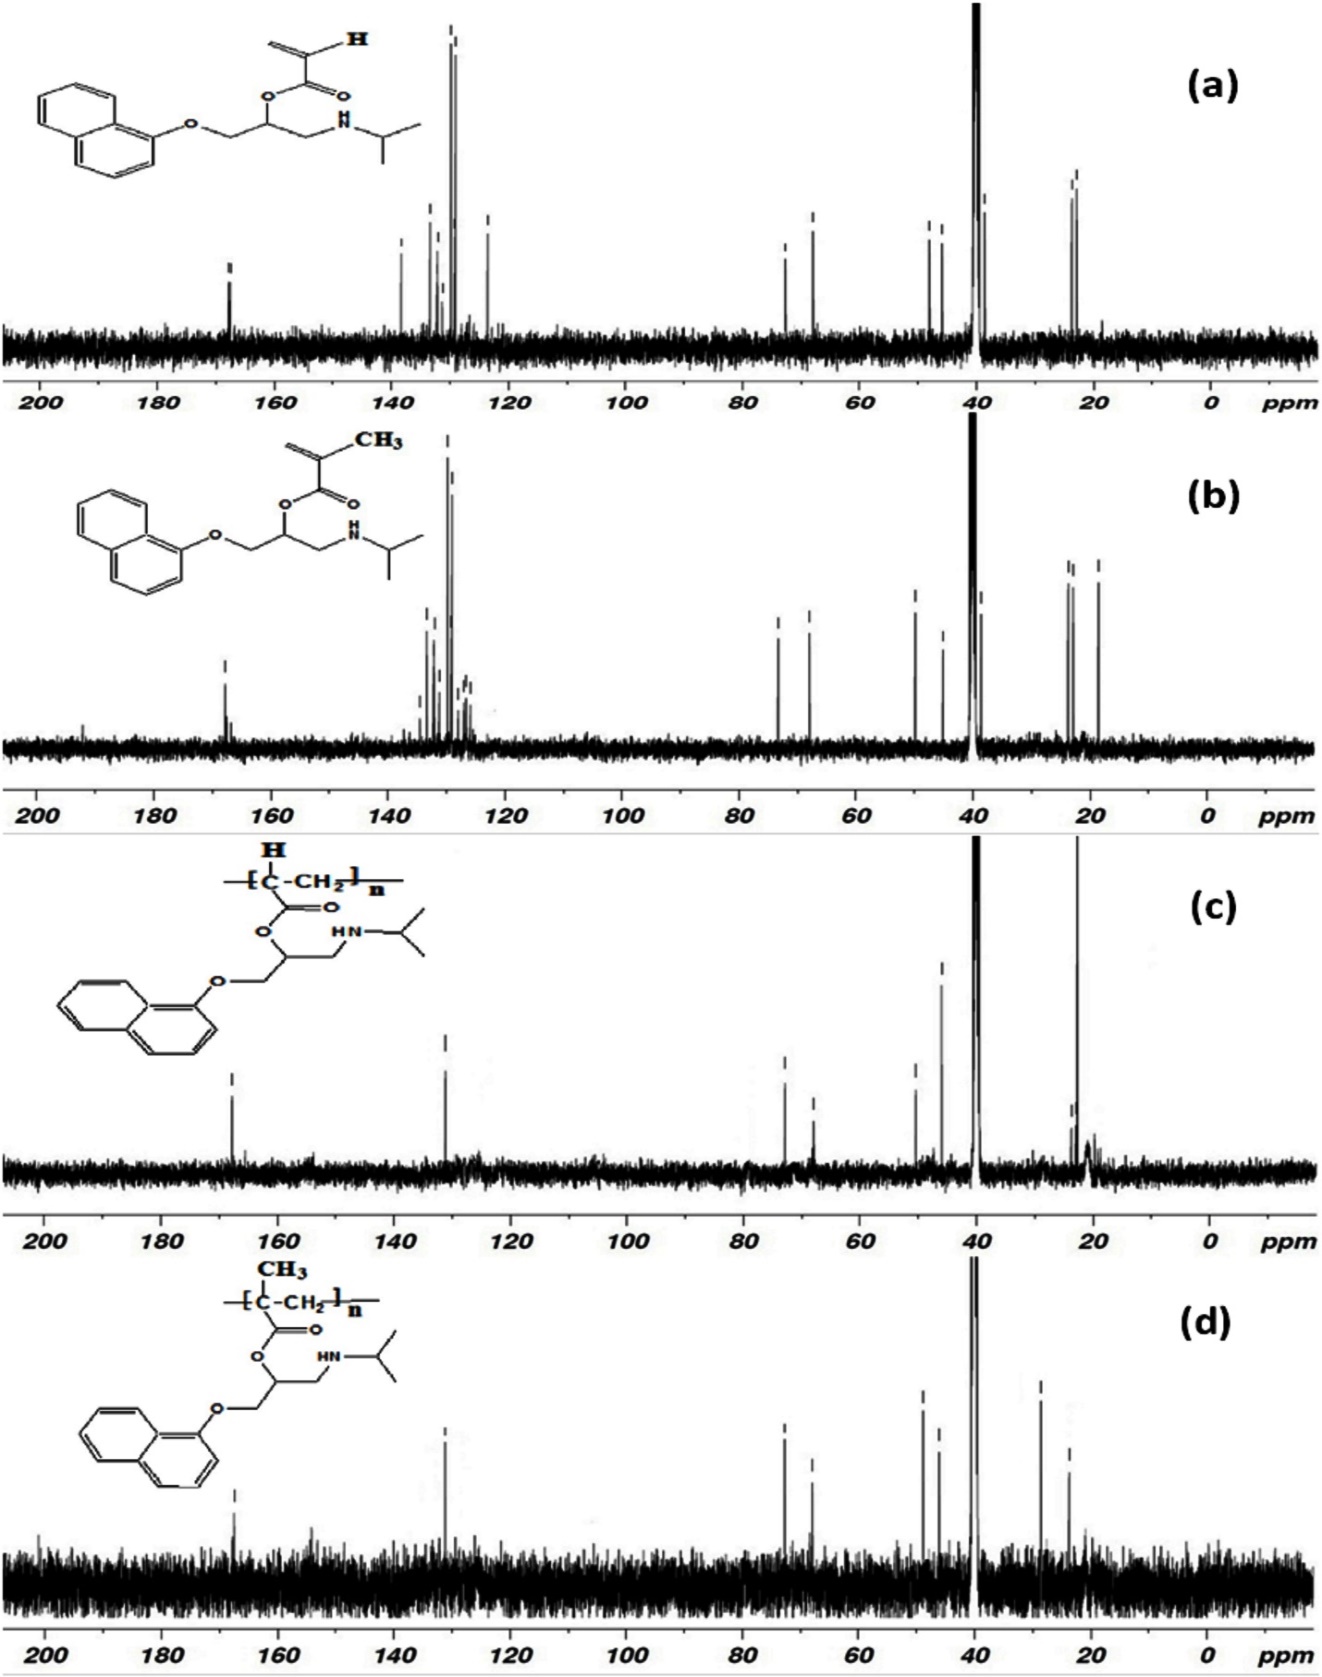


**FIGURE S2**. 13C -NMR Spectra of monomers (a) IANOPA, (b) IANOPMA and polymers (c) IANOPA, (d) IANOPMA

*NMR spectroscopic analysis of polymers*

*1H-NMR spectrum of poly (IANOPA)*

Figure S2(a) shows proton NMR spectrum poly (IANOPA).The signals at 1.1ppm correspond to isopropyl methyl group, whereas at 1.95ppm corresponds to methine (–NH) proton. The signal at 2.5ppm corresponds to acrylic (–CH) methyl proton. The signals at 2.8 and 2.95ppm correspond to isopropyl methine proton and doublet of methylene proton (–CH2–N) respectively. The methylene proton (–O–CH2–) shows signal at 4.2 ppm. The multiplet of aromatic protons show signals at 7.3–8.0ppm. The disappearance of characteristic peaks in region 5.8–6.2 confirms the polymerisation of monomer.

*1H-NMR spectrum of poly (IANOPMA)*

FIGURE S2(b) shows the proton NMR spectrum of poly (IANOPMA).The signals at 1.0ppm correspond to isopropyl methyl group whereas at 1.6ppm corresponds to methine (–NH) proton. The signals at 2.5 and 2.9ppm correspond to isopropyl methine proton and doublet of methylene proton (–CH2–N) respectively. The methylene proton (–O–CH2–) shows signal at 4.1ppm. The multiplet of aromatic protons show signals at 7.4–8.3ppm. The signal at 2.1ppm corresponds to acrylic (–CH) methyl proton. The disappearance of characteristic peaks in region 5.6–6.2 confirms the polymerisation of monomer.

*13C–NMR spectrum of poly (IANOPA)*

Figure S2(c) shows decoupled 13C NMR spectrum of poly (IANOPA). The resonance signals at 24ppm may due to isopropyl carbons (–CH3). The (–H2C–NH) and (–HC–NH) show resonance signal at 45 and 49ppm respectively. Similarly (–H2C-O) and (–HC-O) shows resonance signal at 68 and 73ppm respectively. The aromatic carbons show resonance signal at 132 ppm. Ester carbonyl carbon (–C=O) provides resonance signals at 168 ppm. The disappearance of signal at 138ppm confirms the polymerization of monomer.

*13C–NMR spectrum of poly (IANOPMA)*

FIGURE S2(d). shows the decoupled 13C NMR spectrum of poly (IANOPMA). Signals for isopropyl carbons (–CH3) and methacrylate carbons (–CH3) are 24 and 28 ppm, respectively.The (–H2C–NH) and (–HC–NH) show resonance signal at 44 and 47ppm respectively.Similarly (–H2C-O) and(–HC-O)shows resonance signal at 67 and73ppm respectively.The aromatic carbons show resonance signal at 132ppm.At 168ppm, the resonance signals correspond to the ester carbonyl carbon (–C=O).The disappearance of signal at 138ppm confirms the polymerization of monomer.

**GPC analysis for Molecular weights of poly (IANOPA) and poly (IANOPMA)**


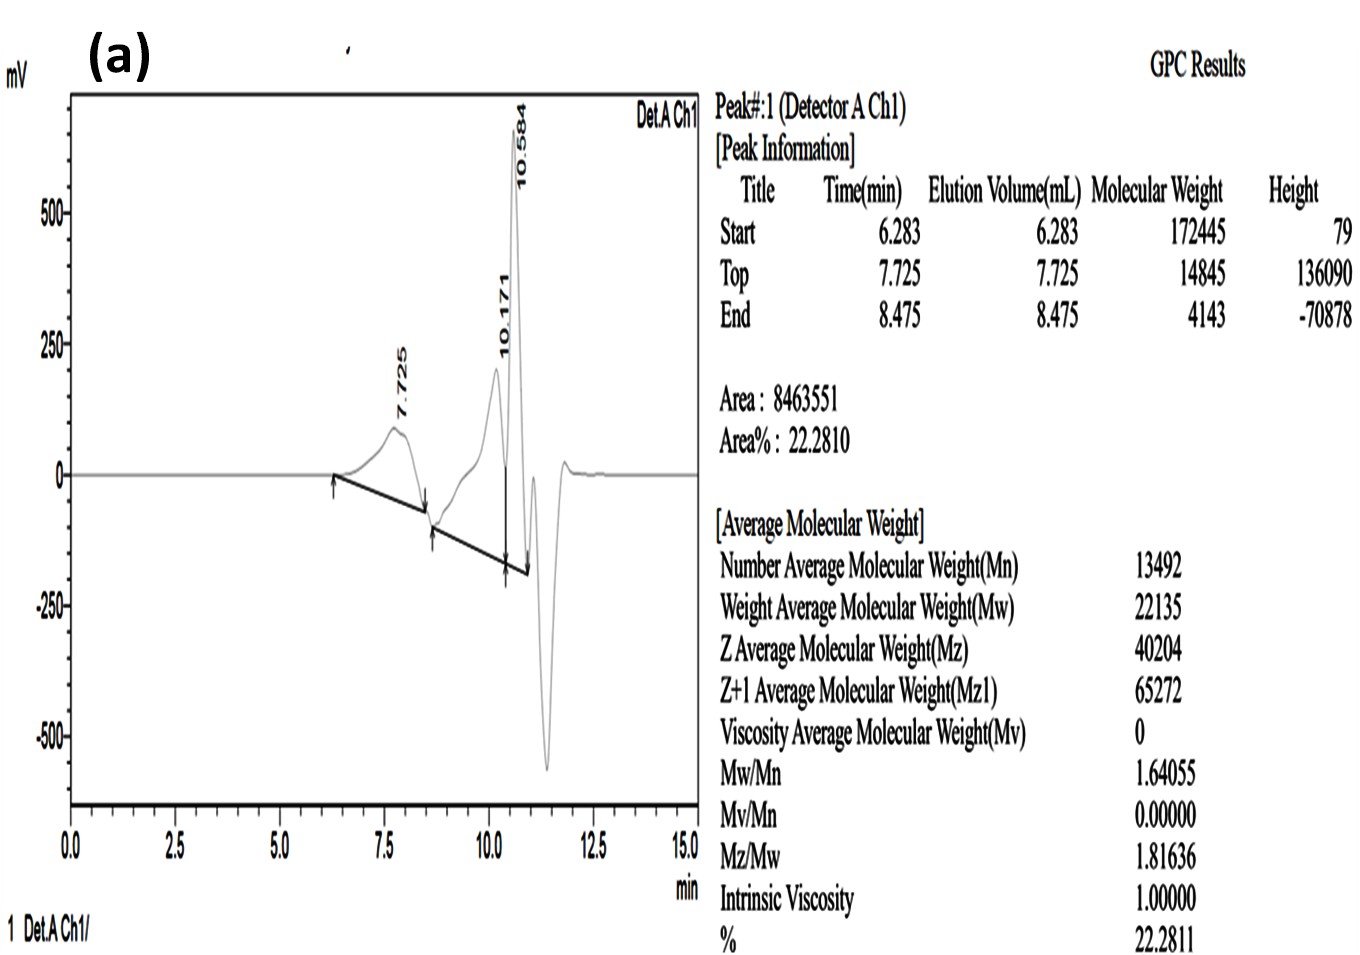


FIGURE S3(a). GPC graph and molecular weight data of Poly (IANOPA)


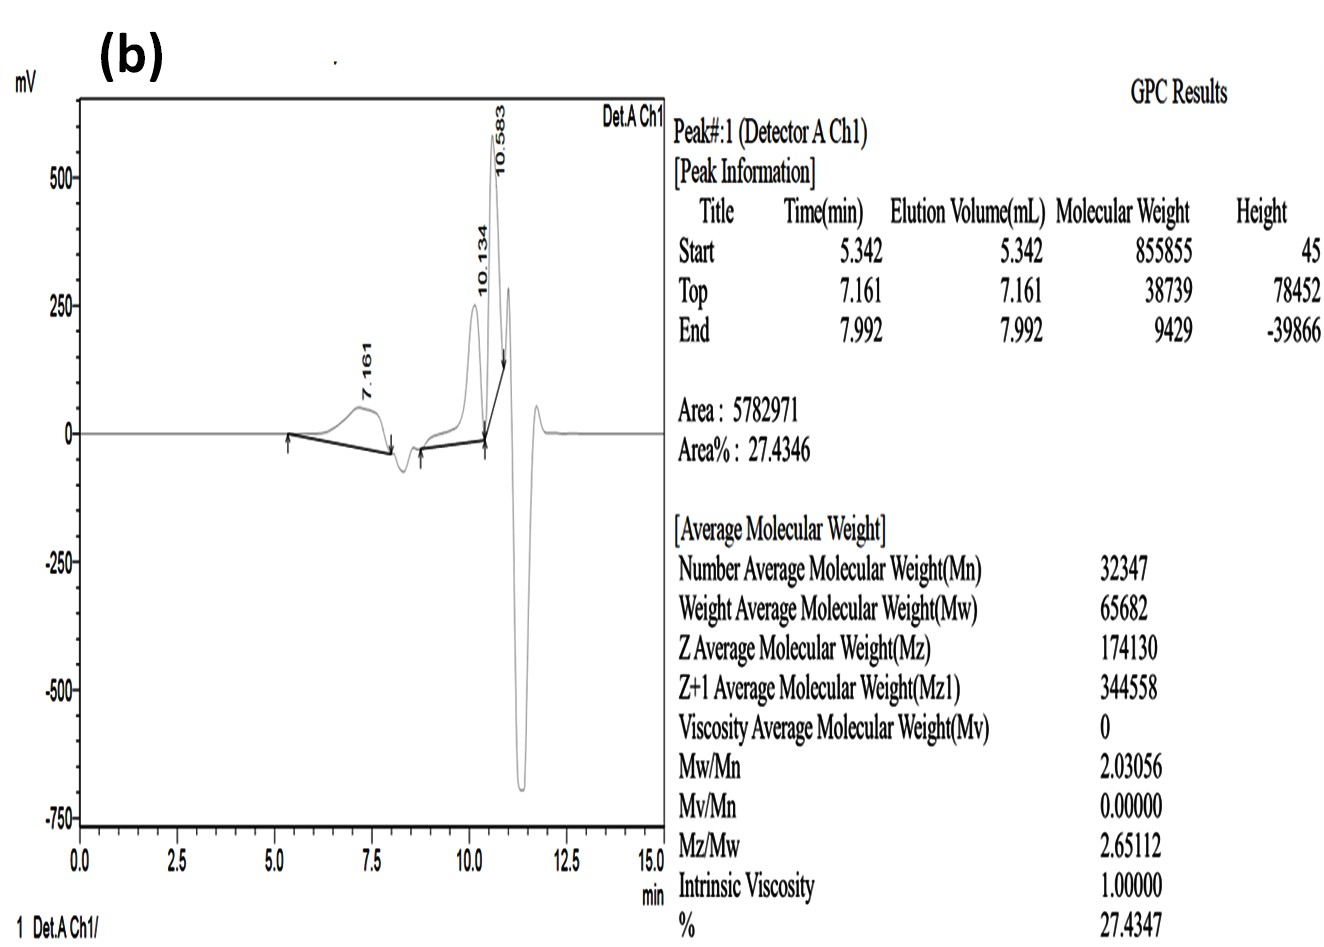


FIGURE S3(b). GPC graph and molecular weight data of Poly (IANOPMA)

**Applications**

*Antibacterial evaluation of monomers and polymers*

The antibacterial ability of monomers: IANOPA and IANOPMA, as well as poly (IANOPA) and poly (IANOPMA), against *Staphylococcus aureus* and *Pseudomonas aeruginosa,* were studied. Well diffusion method was used to carry out the controlled experiment using DMSO solution.In FIGURES S3(a), S3(b), S3(c) and S3(d), photographic images of polymers are also displayed.The predicted zone of inhibition date is presented in Table S1.


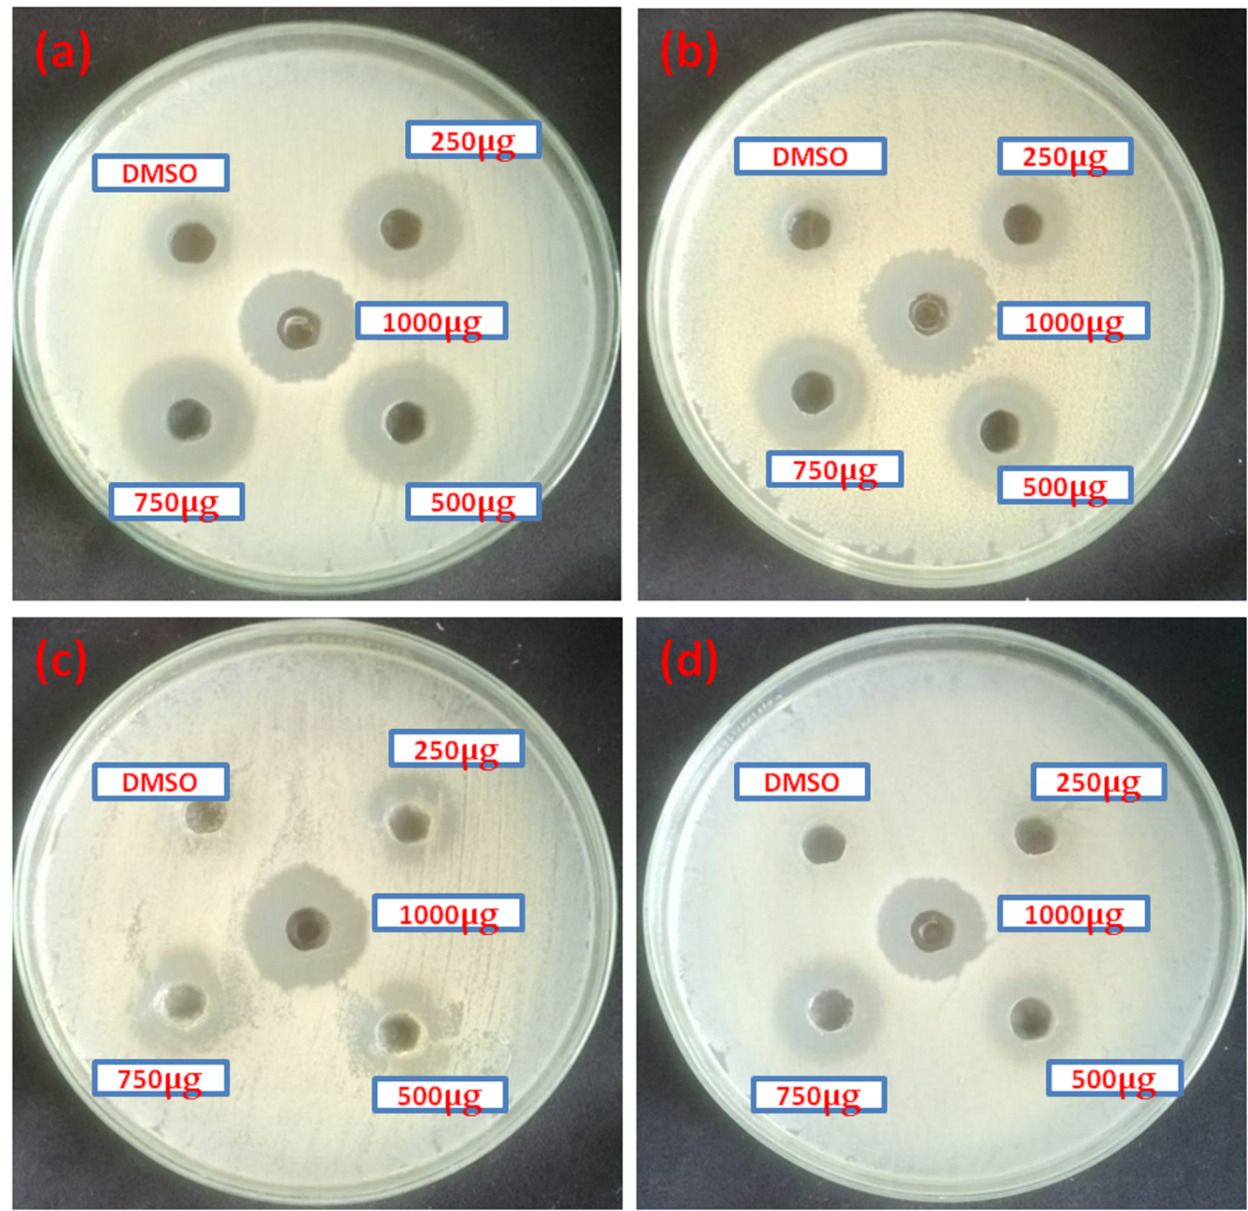


FIGURE S4.Antibacterial activity of poly (IANOPA): (a) *S. aureus*, (b) *P. aeruginosa* and poly (IANOPMA): (c) *S. aureus*, (d) *P. aeruginosa*

TABLE S1.Antibacterial evaluation of monomers & polymers using well diffusion method Inhibition zone of monomers and polymers on *Staphylococcus aureus* and *Pseudomona aeruginosa*

| **Samples** | **Inhibition Zone (mm)** | | | | | | | |
| --- | --- | --- | --- | --- | --- | --- | --- | --- |
| **Gram positive (*S. aureus*)**  **(µg/ml)** | | | | **Gram negative (*P. aeruginosa*)**  **(µg/ml)** | | | |
| 250 | 500 | 750 | 1000 | 250 | 500 | 750 | 1000 |
| IANOPA | 8 | 9 | 10 | 10 | 9 | 9 | 10 | 10 |
| IANOPMA | 8 | 9 | 11 | 11 | 8 | 8 | 9 | 9 |
| Poly(IANOPA) | 9 | 11 | 14 | 15 | 10 | 10 | 13 | 14 |
| Poly(IANOPMA) | 9 | 11 | 16 | 16 | 9 | 10 | 15 | 15 |
